# Supplementary material for: Near-Infrared Heptamethine Cyanine Based Iron Oxide Nanoparticles for Tumor Targeted Multimodal Imaging and Photothermal Therapy
Source: PubMed Central journal article supplement (PMC5437012; doi:10.1038/s41598-017-01108-5), 2017-05-18
Supplement: 41598_2017_1108_MOESM1_ESM.pdf [file 41598_2017_1108_MOESM1_ESM.pdf]

# Near-Infrared Heptamethine Cyanine Based Iron Oxide Nanoparticles for Tumor Targeted Multimodal Imaging and Photothermal Therapy

*Sejy Lee<sup>1#</sup>, Reju George Thomas<sup>1#</sup>, Myeong Ju Moon<sup>1</sup>, Hyeong Ju Park<sup>2</sup>, In-Kyu Park<sup>3</sup>,  
Byeong-Il Lee<sup>2</sup>, Yong Yeon Jeong<sup>1\*</sup>*

<sup>1</sup>Department of Radiology, Chonnam National University Hwasun Hospital, Hwasun 58128,  
South Korea,

<sup>2</sup>Medical Photonics Research Center, Korea Photonics Technology Institute, Gwangju  
61007, South Korea

<sup>3</sup>Department of Biomedical Sciences, Chonnam National University Medical School,  
Gwangju 61469, South Korea

E-Mail: yjeong@jnu.ac.kr

<sup>#</sup> The two authors equally contributed to this work

<sup>\*</sup> Author to whom correspondence should be addressed; E-Mail: yjeong@jnu.ac.kr;

Tel.: +82-61-379-7102; Fax: +82-91-379-7133.

## Supplementary

### *In vivo* MR imaging of DSPE-SPION

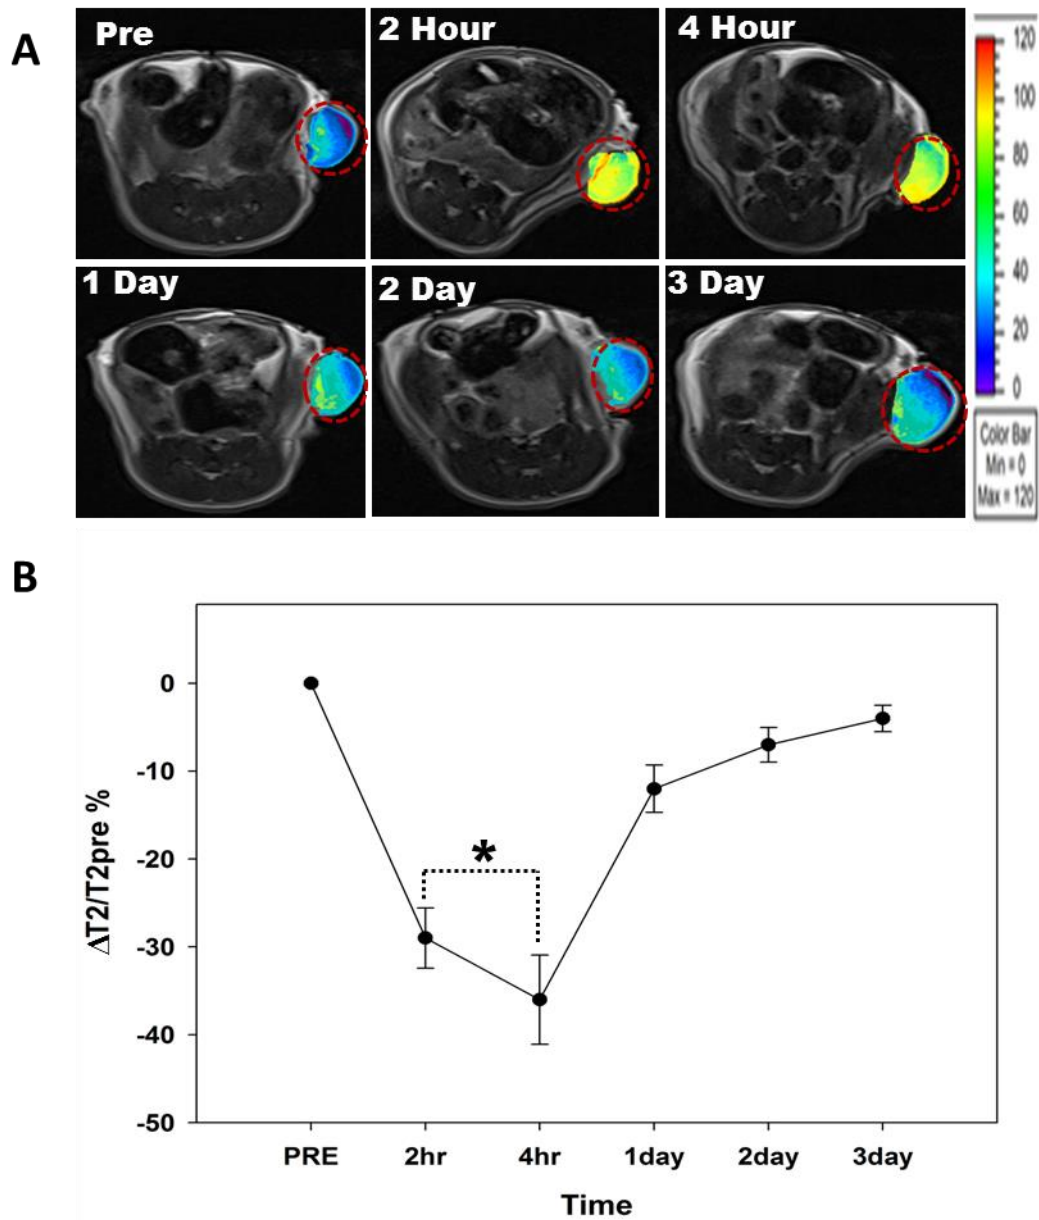

**Figure S1.** *In vivo* MR imaging of SCC7 tumor. (A) T2-weighted MR imaging of DSPE-SPION. (B) The signal intensity change of T2-weighted MR imaging measured at different time point ( pre, 2hr, 4hr, 1day, 2day, 3day) by 10 mg/kg[Fe]DSPE-SPION (in PBS) injected through tail vein. \*P < 0.05 relative to the pre injection T2 contrast (n=3).

***Ex vivo* Prussian blue staining**

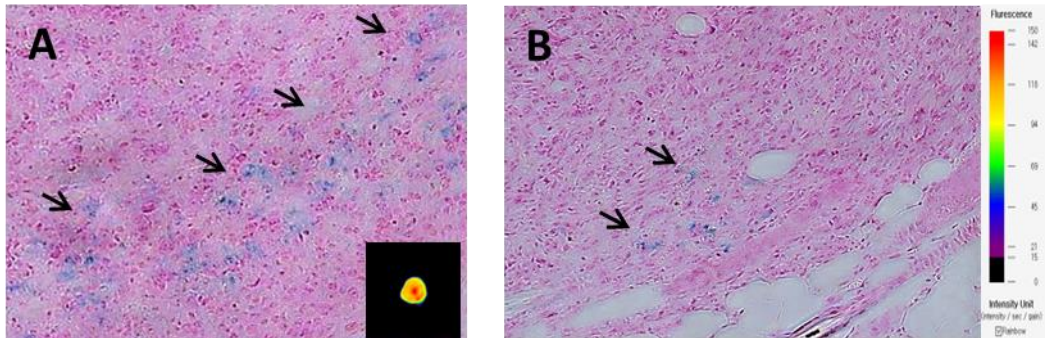

**Figure S2.** Prussian blue staining in *ex vivo* SCC7 tumor at 1 day. (A) MHI-DSPE-SPION intravenously injected at 10 mg/kg [Fe] concentration in 200  $\mu$ l PBS. (B) DSPE-SPION intravenously injected at 10 mg/kg [Fe] concentration in 200  $\mu$ l PBS. The uptake of SPION in SCC7 tumor cell shows blue color in Prussian blue staining (arrows).

### Photothermal studies of DSPE-SPION

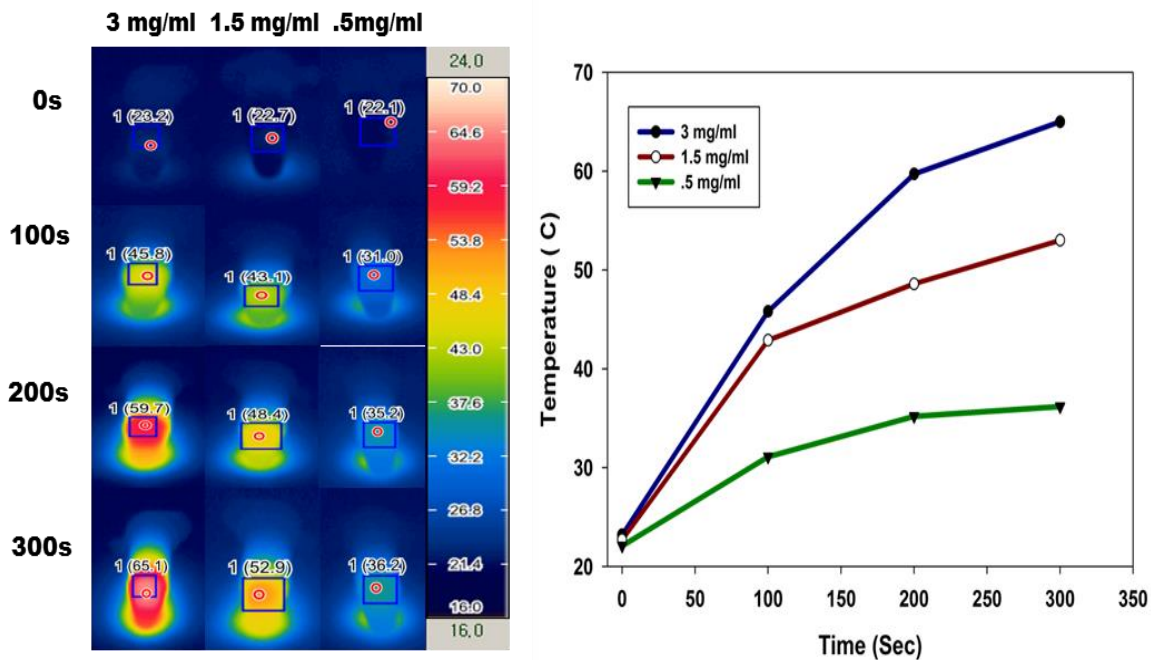

**Figure S3.** Photothermal studies of DSPE-SPION (a) Temperature rise after laser irradiation of different concentrations of DSPE-SPION. (b) Quantification of temperature rise after laser irradiation of different concentrations of DSPE-SPION. 2W/cm<sup>2</sup> laser was used for this experiment.

## *In vivo* PTT intra-tumoral injection of MHI-DSPE-SPION and DSPE-SPION

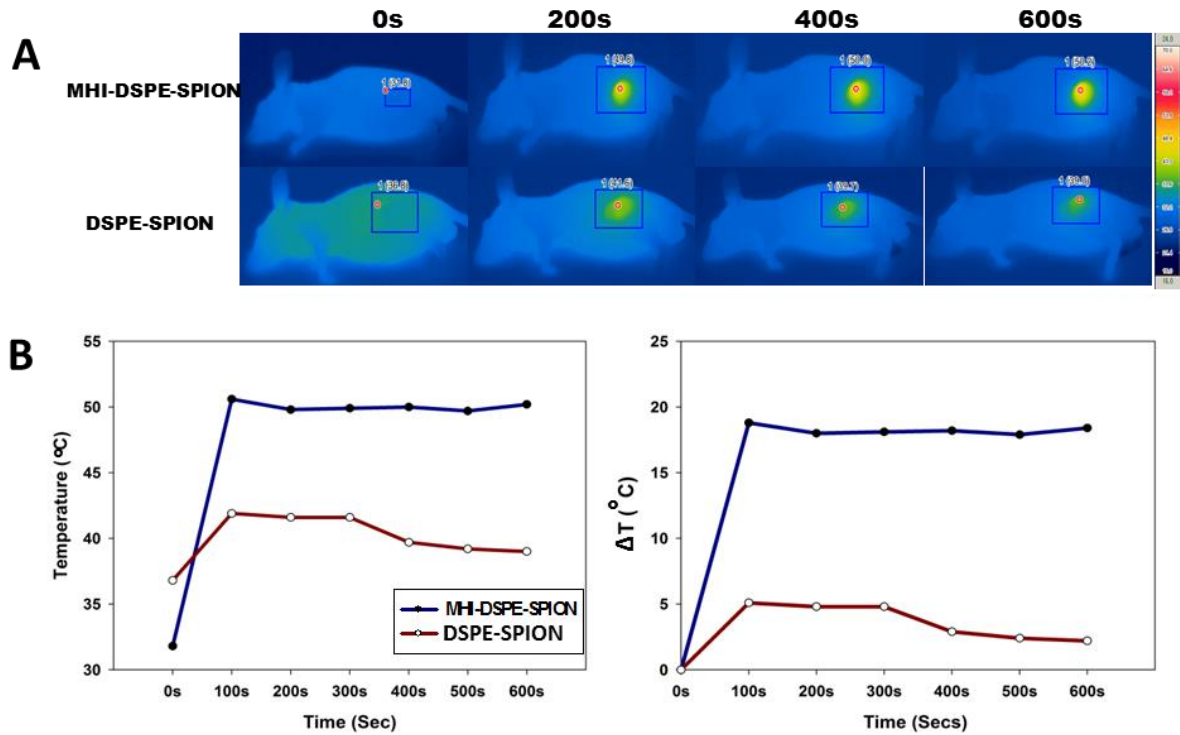

**Figure S4.** Temperature increasing profiles in SCC7 tumour tissue after *in vivo* photothermal treatment. (A) Infrared photothermal images of partial mice measured after intra tumor injection and laser irradiation. The intratumoral injection with 100  $\mu$ L MHI-DSPE-SPION at 10mg/kg [Fe] concentration in PBS and 100  $\mu$ L DSPE-SPION at 10mg/kg [Fe] plus further laser irradiation. (B) Maximum temperature profiles of SCC7 subcutaneous tumors after tail vein post injection plus further laser irradiation. (C) Temperature change of tumor area upon laser irradiation.
